# Supplementary material
Source: MDPI journal article supplement (https://www.mdpi.com/2227-9717/9/8/1473)
Supplement: s1 [file s1]

**Figure S1.** Results of GO enrichment analysis.

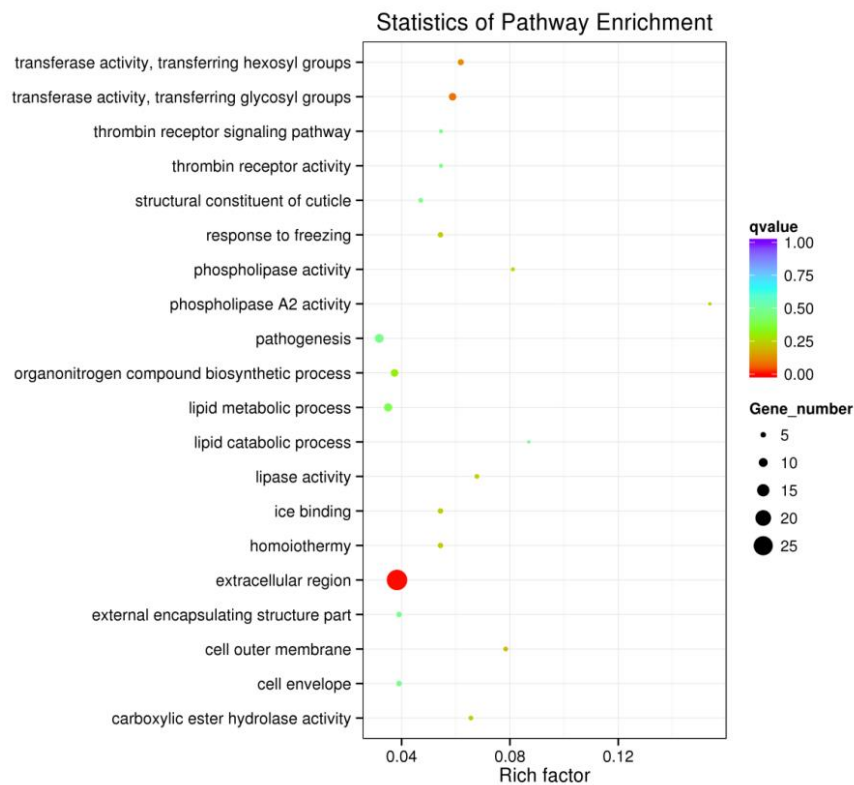

**Figure S2.** Results of KEGG analysis.

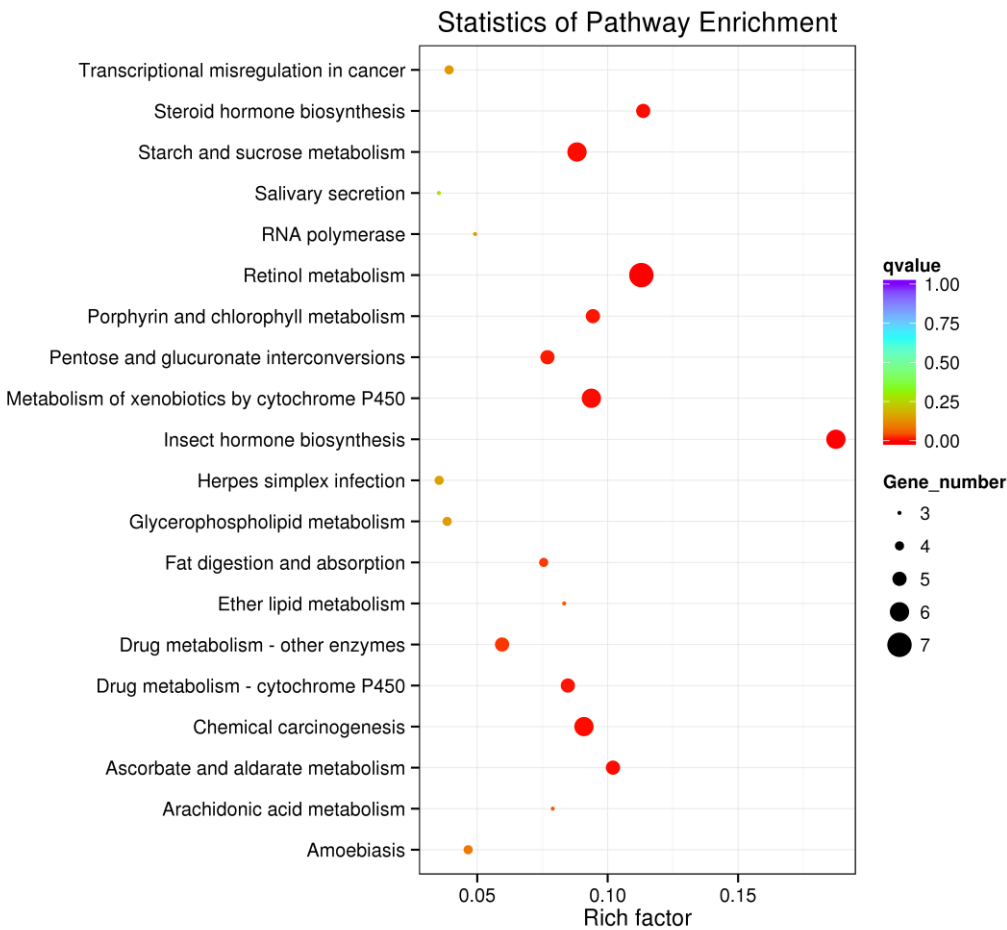

**Table S1.** Genes included in GO enrichment results.

| GO_Term                                            | GO_Class | P value   | Genes                                                                                                                                                                                                                                                                                                                                                                                                                                                                                                                                                                                                                                                                                                                                                                                                                                                                                                                                                                                                                                                                                                                                                                                                                                                                                                                                                                                                                                                                                                                                                                                                                       |
|----------------------------------------------------|----------|-----------|-----------------------------------------------------------------------------------------------------------------------------------------------------------------------------------------------------------------------------------------------------------------------------------------------------------------------------------------------------------------------------------------------------------------------------------------------------------------------------------------------------------------------------------------------------------------------------------------------------------------------------------------------------------------------------------------------------------------------------------------------------------------------------------------------------------------------------------------------------------------------------------------------------------------------------------------------------------------------------------------------------------------------------------------------------------------------------------------------------------------------------------------------------------------------------------------------------------------------------------------------------------------------------------------------------------------------------------------------------------------------------------------------------------------------------------------------------------------------------------------------------------------------------------------------------------------------------------------------------------------------------|
| extracellular region                               | CC       | 9.65E-06  | <p><i>low molecular mass 30 kDa lipoprotein 21G1-like [Bombyx mori]</i>,<i>low molecular mass 30 kDa lipoprotein 19G1-like [Bombyx mori]</i>, <i>low molecular mass 30 kDa lipoprotein 19G1-like [Bombyx mori]</i>, <i>alcohol dehydrogenase precursor [Bombyx mori]</i>, <i>uncharacterized protein LOC101745266 [Bombyx mori]</i>,<i>uncharacterized protein LOC101740086 [Bombyx mori]</i>,<i>uncharacterized protein LOC101739948 [Bombyx mori]</i>,<i>serine protease inhibitor 21 isoform X3 [Bombyx mori]</i>,<i>phospholipase A2-like [Bombyx mori]</i>,<i>microvitellogenin-like [Bombyx mori]</i>,<i>cuticular protein RR-2 motif 58 precursor [Bombyx mori]</i>,<i>seroin 1 precursor [Bombyx mori]</i>,<i>uncharacterized protein LOC101742341 [Bombyx mori]</i>,<i>RNA exonuclease 4-like [Bombyx mori]</i>,<i>uncharacterized protein LOC101746057 [Bombyx mori]</i>,<i>uncharacterized protein LOC101736844 [Bombyx mori]</i>,<i>actin cytoskeleton-regulatory complex protein PAN1 [Bombyx mori]</i>,<i>microvitellogenin-like [Bombyx mori]</i>,<i>low molecular 30 kDa lipoprotein PBMHP-12-like [Bombyx mori]</i>,<i>low molecular mass 30 kDa lipoprotein 19G1-like precursor [Bombyx mori]</i>,<i>low molecular 30 kDa lipoprotein PBMHPC-19-like precursor [Bombyx mori]</i>,<i>plasma kallikrein-like [Bombyx mori]</i>,<i>uncharacterized protein LOC101743393 [Bombyx mori]</i>,<i>uncharacterized protein LOC105843019 [Bombyx mori]</i>,<i>uncharacterized protein LOC101742472 [Bombyx mori]</i>,<i>spherulin-2A-like [Bombyx mori]</i>,<i>Low calcium response V antigen [Bombyx mori]</i></p> |
| transferase activity, transferring glycosyl groups | MF       | 0.0020812 | <p><i>UDP-glycosyltransferase UGT33R1 precursor [Bombyx mori]</i>,<i>UDP-glycosyltransferase UGT33R2 precursor [Bombyx mori]</i>,<i>UDP-glycosyltransferase UGT33R2 precursor [Bombyx mori]</i>,<i>UDP-glucosyltransferase precursor 46 [Bombyx mori]</i>,<i>UDP-glycosyltransferase UGT46A1 [Bombyx mori]</i>,<i>phospholipase A2-like isoform X1 [Bombyx mori]</i>,<i>cuticular protein glycine-rich 26 precursor [Bombyx mori]</i>,<i>beta-1,4-galactosyltransferase 7-like [Bombyx mori]</i></p>                                                                                                                                                                                                                                                                                                                                                                                                                                                                                                                                                                                                                                                                                                                                                                                                                                                                                                                                                                                                                                                                                                                        |
| transferase activity, transferring hexosyl groups  | MF       | 0.0058270 | <p><i>UDP-glycosyltransferase UGT33R1 precursor [Bombyx mori]</i>,<i>UDP-glycosyltransferase UGT33R2 precursor [Bombyx mori]</i>,<i>UDP-glycosyltransferase UGT33R2 precursor [Bombyx mori]</i>,<i>UDP-glucosyltransferase precursor 85 precursor [Bombyx mori]</i>,<i>UDP-glucosyltransferase precursor [Bombyx mori]</i>,<i>UDP-glycosyltransferase UGT46A1 [Bombyx mori]</i>,<i>phospholipase A2-like isoform X1 [Bombyx mori]</i></p>                                                                                                                                                                                                                                                                                                                                                                                                                                                                                                                                                                                                                                                                                                                                                                                                                                                                                                                                                                                                                                                                                                                                                                                   |

|                                              |    |             |                                                                                                                                                                                                                                                                                                                                                                                                                  |
|----------------------------------------------|----|-------------|------------------------------------------------------------------------------------------------------------------------------------------------------------------------------------------------------------------------------------------------------------------------------------------------------------------------------------------------------------------------------------------------------------------|
| cell outer membrane                          | CC | 0.010454439 | uncharacterized protein LOC101742377 [Bombyx mori],sericin 2 isoform 1 precursor [Bombyx mori],uncharacterized protein LOC101737731 [Bombyx mori],glow molecular mass 30 kDa lipoprotein 19G1-like precursor [Bombyx mori]                                                                                                                                                                                       |
|                                              |    |             | lipase member H-A-like [Bombyx mori],phospholipase                                                                                                                                                                                                                                                                                                                                                               |
| lipase activity                              | MF | 0.0171714   | A2-like [Bombyx mori],phospholipase A2-like isoform X1 93 [Bombyx mori],pancreatic triacylglycerol lipase-like [Bombyx mori]                                                                                                                                                                                                                                                                                     |
| carboxylic ester hydrolase activity          | MF | 0.0191887   | lipase member H-A-like [Bombyx mori],phospholipase A2-like [Bombyx mori],phospholipase A2-like isoform X1 04 [Bombyx mori],pancreatic triacylglycerol lipase-like [Bombyx mori]                                                                                                                                                                                                                                  |
| homoiothermy                                 | BP | 0.0193274   | antifreeze protein[Bombyx mori],angiomotin-like [Bombyx mori],vitelline membrane protein Vm26Ab-like [Bombyx mori],ice-structuring glycoprotein-like [Bombyx mori],calpain-B [Bombyx mori]                                                                                                                                                                                                                       |
| ice binding                                  | MF | 0.0193274   | antifreeze protein[Bombyx mori],angiomotin-like [Bombyx mori],vitelline membrane protein Vm26Ab-like [Bombyx mori],ice-structuring glycoprotein-like [Bombyx mori],calpain-B [Bombyx mori]                                                                                                                                                                                                                       |
| response to freezing                         | BP | 0.0193274   | antifreeze protein[Bombyx mori],angiomotin-like [Bombyx mori],vitelline membrane protein Vm26Ab-like [Bombyx mori],ice-structuring glycoprotein-like [Bombyx mori],calpain-B [Bombyx mori]                                                                                                                                                                                                                       |
| phospholipase A2 activity                    | MF | 0.0194101   | phospholipase A2-like [Bombyx mori],phospholipase A2-like isoform X1 [Bombyx mori]                                                                                                                                                                                                                                                                                                                               |
| phospholipase activity                       | MF | 0.023901444 | lipase member H-A-like [Bombyx mori],phospholipase A2-like [Bombyx mori],phospholipase A2-like isoform X1 [Bombyx mori]                                                                                                                                                                                                                                                                                          |
| tachykinin receptor signaling pathway        | BP | 0.0255613   | uncharacterized protein LOC101737931 [Bombyx mori],cuticle protein 6.4 [Bombyx mori]                                                                                                                                                                                                                                                                                                                             |
| organonitrogen compound biosynthetic process | BP | 0.02817645  | 15-hydroxyprostaglandin dehydrogenase [NAD(+)]-like [Bombyx mori],collagenase-like [Bombyx mori],uncharacterized protein LOC105842596 [Bombyx mori],uncharacterized protein LOC105841445 [Bombyx mori],TPA: putative cuticle protein [Bombyx mori],uncharacterized protein LOC101747020 [Bombyx mori],putative cuticle protein CPH45 precursor [Bombyx mori], uncharacterized protein LOC101744973 [Bombyx mori] |
| acid                                         | MF | 0.0288945   | prostatic acid phosphatase-like [Bombyx mori],multiple                                                                                                                                                                                                                                                                                                                                                           |

|                                   |    |                 |                                                                                                                                                                                                                                                                                                                                                                                                                                                                                                                                                                                                                                |
|-----------------------------------|----|-----------------|--------------------------------------------------------------------------------------------------------------------------------------------------------------------------------------------------------------------------------------------------------------------------------------------------------------------------------------------------------------------------------------------------------------------------------------------------------------------------------------------------------------------------------------------------------------------------------------------------------------------------------|
| phosphatase activity              |    |                 | 76 inositol polyphosphate phosphatase 1-like [Bombyx mori]                                                                                                                                                                                                                                                                                                                                                                                                                                                                                                                                                                     |
| interleukin-6 receptor binding    | MF | 0.0333337<br>43 | alcohol dehydrogenase precursor [Bombyx mori]                                                                                                                                                                                                                                                                                                                                                                                                                                                                                                                                                                                  |
| lactose synthase activity         | MF | 0.0333337<br>43 | phospholipase A2-like isoform X1 [Bombyx mori]                                                                                                                                                                                                                                                                                                                                                                                                                                                                                                                                                                                 |
| lactose biosynthetic process      | BP | 0.0333337<br>43 | phospholipase A2-like isoform X1 [Bombyx mori]                                                                                                                                                                                                                                                                                                                                                                                                                                                                                                                                                                                 |
| ferrous iron binding              | MF | 0.0333337<br>43 | extradiol ring-cleavage dioxygenase-like [Bombyx mori]                                                                                                                                                                                                                                                                                                                                                                                                                                                                                                                                                                         |
| lipid metabolic process           | BP | 0.0419104<br>97 | lipase 1-like [Bombyx mori], lipase 1-like [Bombyx mori], lipase member H-A-like [Bombyx mori], lipase member H-A-like [Bombyx mori], lipase member H-A-like [Bombyx mori], phospholipase A2-like [Bombyx mori], short-chain dehydrogenase/reductase-like protein [Danaus plexippus], phospholipase A2-like isoform X1 [Bombyx mori], pancreatic triacylglycerol lipase-like [Bombyx mori], cuticular protein RR-2 motif 60 precursor [Bombyx mori], cuticular protein RR-2 motif 58 precursor [Bombyx mori], cuticular protein RR-1 motif 9 precursor [Bombyx mori], cuticular protein RR-2 motif 124 precursor [Bombyx mori] |
| structural constituent of cuticle | MF | 0.0548029<br>39 | phospholipase A2-like [Bombyx mori], phospholipase A2-like 67 isoform X1 [Bombyx mori]                                                                                                                                                                                                                                                                                                                                                                                                                                                                                                                                         |
| lipid catabolic process           | BP | 0.0564455       | uncharacterized protein LOC101740086 [Bombyx mori], evm.model.Bomo_Chr11.201, phospholipase A2-like [Bombyx mori], uncharacterized protein LOC101742341 [Bombyx mori], RNA exonuclease 4-like [Bombyx mori], uncharacterized protein LOC101746057 [Bombyx mori], low molecular 30 kDa lipoprotein PBMHPC-19-like precursor [Bombyx mori], uncharacterized protein LOC105843019 [Bombyx mori], uncharacterized protein LOC101742472 [Bombyx mori], Low calcium response V antigen [Bombyx mori]                                                                                                                                 |
| pathogenesis                      | BP | 0.0617449       | alaserpin-like [Bombyx mori], uncharacterized protein LOC101742377 [Bombyx mori], sericin 2 isoform 1 precursor [Bombyx mori], uncharacterized protein LOC101737731 [Bombyx mori], glow molecular mass 30 kDa lipoprotein 19G1-like precursor [Bombyx mori]                                                                                                                                                                                                                                                                                                                                                                    |
| cell envelope                     | CC | 0.0646808<br>39 | alaserpin-like [Bombyx mori], uncharacterized protein 39 LOC101742377 [Bombyx mori], sericin 2 isoform 1 precursor                                                                                                                                                                                                                                                                                                                                                                                                                                                                                                             |
| external encapsulating            | CC | 0.0646808       |                                                                                                                                                                                                                                                                                                                                                                                                                                                                                                                                                                                                                                |

---

|                                              |    |                 |                                                                                                                                                                                                        |
|----------------------------------------------|----|-----------------|--------------------------------------------------------------------------------------------------------------------------------------------------------------------------------------------------------|
| structure part                               |    |                 | <i>[Bombyx mori],uncharacterized protein LOC101737731</i><br><i>[Bombyx mori],glow molecular mass 30 kDa lipoprotein</i><br><i>19G1-like precursor [Bombyx mori]</i>                                   |
| thrombin<br>receptor<br>activity             | MF | 0.0649584       | <i>uncharacterized protein LOC105842978 [Bombyx</i><br><i>mori],putative uncharacterized protein DDB_G0282133</i><br><i>[Bombyx mori],uncharacterized protein LOC101743399</i><br><i>[Bombyx mori]</i> |
| thrombin<br>receptor<br>signaling<br>pathway | BP | 0.0649584       | <i>uncharacterized protein LOC105842978 [Bombyx</i><br><i>mori],putative uncharacterized protein DDB_G0282133</i><br><i>[Bombyx mori],uncharacterized protein LOC101743399</i><br><i>[Bombyx mori]</i> |
| adenosine<br>kinase activity                 | MF | 0.0655616<br>92 | <i>collagenase-like [Bombyx mori]</i>                                                                                                                                                                  |
| purine<br>ribonucleoside<br>salvage          | BP | 0.0655616<br>92 | <i>collagenase-like [Bombyx mori]</i>                                                                                                                                                                  |
| DNA<br>transport                             | BP | 0.0655616<br>92 | <i>uncharacterized protein LOC101739948 [Bombyx mori]</i>                                                                                                                                              |
| pericentriolar<br>material                   | CC | 0.0655616<br>92 | <i>calexيتين-2-like [Bombyx mori]</i>                                                                                                                                                                  |
| cell volume<br>homeostasis                   | BP | 0.0655616<br>92 | <i>uncharacterized protein LOC101744296 [Bombyx mori]</i>                                                                                                                                              |

---

**Table S2.** Genes included in KEGG analysis results.

| Map Title                                    | P value   | Genes                                                                                                                                                                                                                                                                                                                                                                                                                                                                                                                                                                                                                                                                                                                                                                                                                                                                                                                                                                                                                                                                                                                                                       |
|----------------------------------------------|-----------|-------------------------------------------------------------------------------------------------------------------------------------------------------------------------------------------------------------------------------------------------------------------------------------------------------------------------------------------------------------------------------------------------------------------------------------------------------------------------------------------------------------------------------------------------------------------------------------------------------------------------------------------------------------------------------------------------------------------------------------------------------------------------------------------------------------------------------------------------------------------------------------------------------------------------------------------------------------------------------------------------------------------------------------------------------------------------------------------------------------------------------------------------------------|
| Insect hormone biosynthesis                  | 9.52E-07  | <i>calexcitin-2-like [Bombyx mori]</i> , <i>uncharacterized protein LOC101742377 [Bombyx mori]</i> ,<br><i>uncharacterized protein LOC101745533 [Bombyx mori]</i> ,<br><i>uncharacterized protein LOC101743036 [Bombyx mori]</i> , <i>farnesol dehydrogenase-like isoform X1 [Bombyx mori]</i> , <i>uncharacterized protein LOC101738236 [Bombyx mori]</i><br><i>UDP-glycosyltransferase UGT33R1 precursor [Bombyx mori]</i> <i>UDP-glycosyltransferase UGT33R2 precursor [Bombyx mori]</i> , <i>UDP-glycosyltransferase UGT33R2 precursor [Bombyx mori]</i>                                                                                                                                                                                                                                                                                                                                                                                                                                                                                                                                                                                                |
| Retinol metabolism                           | 3.96E-06  | <i>UDP-glucosyltransferase precursor [Bombyx mori]</i> ,<br><i>UDP-glycosyltransferase UGT46A1 [Bombyx mori]</i> , <i>17-beta-hydroxysteroid dehydrogenase 14-like [Bombyx mori]</i> , <i>17-beta-hydroxysteroid dehydrogenase 14-like [Bombyx mori]</i><br><i>UDP-glycosyltransferase UGT33R1 precursor [Bombyx mori]</i> , <i>UDP-glycosyltransferase UGT33R2 precursor [Bombyx mori]</i> ,<br><i>UDP-glycosyltransferase UGT33R2 precursor [Bombyx mori]</i> , <i>UDP-glucosyltransferase precursor [Bombyx mori]</i> , <i>UDP-glycosyltransferase UGT46A1 [Bombyx mori]</i> , <i>carbonyl reductase [NADPH] 3-like [Bombyx mori]</i><br><i>UDP-glycosyltransferase UGT33R1 precursor [Bombyx mori]</i> , <i>UDP-glycosyltransferase UGT33R2 precursor [Bombyx mori]</i> ,<br><i>UDP-glycosyltransferase UGT33R2 precursor [Bombyx mori]</i> , <i>UDP-glucosyltransferase precursor [Bombyx mori]</i> , <i>UDP-glycosyltransferase UGT46A1 [Bombyx mori]</i> , <i>carbonyl reductase [NADPH] 3-like [Bombyx mori]</i><br><i>UDP-glycosyltransferase UGT33R1 precursor [Bombyx mori]</i> , <i>UDP-glycosyltransferase UGT33R2 precursor [Bombyx mori]</i> |
| Metabolism of xenobiotics by cytochrome P450 | 6.01E-05  | <i>UDP-glycosyltransferase UGT33R2 precursor [Bombyx mori]</i> , <i>UDP-glucosyltransferase precursor [Bombyx mori]</i> , <i>UDP-glycosyltransferase UGT46A1 [Bombyx mori]</i> , <i>carbonyl reductase [NADPH] 3-like [Bombyx mori]</i><br><i>UDP-glycosyltransferase UGT33R1 precursor [Bombyx mori]</i> , <i>UDP-glycosyltransferase UGT33R2 precursor [Bombyx mori]</i> ,<br><i>UDP-glycosyltransferase UGT33R2 precursor [Bombyx mori]</i> , <i>UDP-glucosyltransferase precursor [Bombyx mori]</i> , <i>UDP-glycosyltransferase UGT46A1 [Bombyx mori]</i> , <i>carbonyl reductase [NADPH] 3-like [Bombyx mori]</i><br><i>UDP-glycosyltransferase UGT33R1 precursor [Bombyx mori]</i> , <i>UDP-glycosyltransferase UGT33R2 precursor [Bombyx mori]</i>                                                                                                                                                                                                                                                                                                                                                                                                  |
| Chemical carcinogenesis                      | 7.16E-05  | <i>UDP-glycosyltransferase UGT33R2 precursor [Bombyx mori]</i> , <i>UDP-glucosyltransferase precursor [Bombyx mori]</i> , <i>UDP-glycosyltransferase UGT46A1 [Bombyx mori]</i> , <i>carbonyl reductase [NADPH] 3-like [Bombyx mori]</i><br><i>UDP-glycosyltransferase UGT33R1 precursor [Bombyx mori]</i> , <i>UDP-glycosyltransferase UGT33R2 precursor [Bombyx mori]</i>                                                                                                                                                                                                                                                                                                                                                                                                                                                                                                                                                                                                                                                                                                                                                                                  |
| Starch and sucrose metabolism                | 8.49E-05  | <i>mori]</i> , <i>UDP-glycosyltransferase UGT33R2 precursor [Bombyx mori]</i> , <i>TPA: putative cuticle protein [Bombyx mori]</i> , <i>UDP-glucosyltransferase precursor [Bombyx mori]</i> , <i>UDP-glycosyltransferase UGT46A1 [Bombyx mori]</i>                                                                                                                                                                                                                                                                                                                                                                                                                                                                                                                                                                                                                                                                                                                                                                                                                                                                                                          |
| Steroid hormone                              | 0.0001026 | <i>UDP-glycosyltransferase UGT33R1 precursor</i>                                                                                                                                                                                                                                                                                                                                                                                                                                                                                                                                                                                                                                                                                                                                                                                                                                                                                                                                                                                                                                                                                                            |

|                                          |                 |                                                                                                                                                                                                                                                                                                                                                                                                                  |
|------------------------------------------|-----------------|------------------------------------------------------------------------------------------------------------------------------------------------------------------------------------------------------------------------------------------------------------------------------------------------------------------------------------------------------------------------------------------------------------------|
| biosynthesis                             | 13              | [ <i>Bombyx mori</i> ], UDP-glycosyltransferase UGT33R2 precursor [ <i>Bombyx mori</i> ], UDP-glycosyltransferase UGT33R2 precursor [ <i>Bombyx mori</i> ], UDP-glucosyltransferase precursor [ <i>Bombyx mori</i> ], UDP-glycosyltransferase UGT46A1 [ <i>Bombyx mori</i> ] UDP-glycosyltransferase UGT33R1 precursor [ <i>Bombyx mori</i> ], UDP-glycosyltransferase UGT33R2 precursor [ <i>Bombyx mori</i> ], |
| Ascorbate and aldarate metabolism        | 0.0001728<br>21 | UDP-glycosyltransferase UGT33R2 precursor [ <i>Bombyx mori</i> ], UDP-glucosyltransferase precursor [ <i>Bombyx mori</i> ], UDP-glycosyltransferase UGT46A1 [ <i>Bombyx mori</i> ] UDP-glycosyltransferase UGT33R1 precursor [ <i>Bombyx mori</i> ], UDP-glycosyltransferase UGT33R2 precursor [ <i>Bombyx mori</i> ],                                                                                           |
| Porphyrin and chlorophyll metabolism     | 0.0002515<br>56 | [ <i>Bombyx mori</i> ], UDP-glycosyltransferase UGT33R2 precursor [ <i>Bombyx mori</i> ], UDP-glucosyltransferase precursor [ <i>Bombyx mori</i> ], UDP-glycosyltransferase UGT46A1 [ <i>Bombyx mori</i> ] UDP-glycosyltransferase UGT33R1 precursor [ <i>Bombyx mori</i> ], UDP-glycosyltransferase UGT33R2 precursor [ <i>Bombyx mori</i> ],                                                                   |
| Drug metabolism - cytochrome P450        | 0.0004174<br>74 | [ <i>Bombyx mori</i> ], UDP-glycosyltransferase UGT33R2 precursor [ <i>Bombyx mori</i> ], UDP-glucosyltransferase precursor [ <i>Bombyx mori</i> ], UDP-glycosyltransferase UGT46A1 [ <i>Bombyx mori</i> ] UDP-glycosyltransferase UGT33R1 precursor [ <i>Bombyx mori</i> ], UDP-glycosyltransferase UGT33R2 precursor [ <i>Bombyx mori</i> ],                                                                   |
| Pentose and glucuronate interconversions | 0.0006552<br>38 | [ <i>Bombyx mori</i> ], UDP-glycosyltransferase UGT33R2 precursor [ <i>Bombyx mori</i> ], UDP-glucosyltransferase precursor [ <i>Bombyx mori</i> ], UDP-glycosyltransferase UGT46A1 [ <i>Bombyx mori</i> ] UDP-glycosyltransferase UGT33R1 precursor [ <i>Bombyx mori</i> ], UDP-glycosyltransferase UGT33R2 precursor [ <i>Bombyx mori</i> ],                                                                   |
| Drug metabolism - other enzymes          | 0.0020913<br>95 | [ <i>Bombyx mori</i> ], UDP-glycosyltransferase UGT33R2 precursor [ <i>Bombyx mori</i> ], UDP-glucosyltransferase precursor [ <i>Bombyx mori</i> ], UDP-glycosyltransferase UGT46A1 [ <i>Bombyx mori</i> ] phospholipase A2-like [ <i>Bombyx mori</i> ],                                                                                                                                                         |
| Fat digestion and absorption             | 0.0025253<br>54 | 1-acyl-sn-glycerol-3-phosphate acyltransferase alpha-like [ <i>Bombyx mori</i> ]                                                                                                                                                                                                                                                                                                                                 |



---

|                                                        |             |                                                                                                                                                                                                                                                                                                                                                                                                                                                                                                                                                    |
|--------------------------------------------------------|-------------|----------------------------------------------------------------------------------------------------------------------------------------------------------------------------------------------------------------------------------------------------------------------------------------------------------------------------------------------------------------------------------------------------------------------------------------------------------------------------------------------------------------------------------------------------|
|                                                        |             | <i>mori</i> ] ,scavenger receptor class B member 1 like protein 15 [ <i>Bombyx mori</i> ], phospholipase A2-like isoform X1 [ <i>Bombyx mori</i> ]                                                                                                                                                                                                                                                                                                                                                                                                 |
| Tropane, piperidine and pyridine alkaloid biosynthesis | 0.003151203 | <i>short-chain dehydrogenase/reductase-like protein [Danaus plexippus]</i> ,dehydrogenase/reductase SDR family member 2, mitochondrial-like [ <i>Bombyx mori</i> ] phospholipase A2-like [ <i>Bombyx mori</i> ] ,rRNA                                                                                                                                                                                                                                                                                                                              |
| Ether lipid metabolism                                 | 0.0068498   | 2'-O-methyltransferase fibrillar-like [ <i>Bombyx mori</i> ], phospholipase A2-like isoform X1 [ <i>Bombyx mori</i> ] phospholipase A2-like [ <i>Bombyx mori</i> ] ,phospholipase A2-like isoform X1 [ <i>Bombyx mori</i> ] ,carbonyl reductase [NADPH] 3-like [ <i>Bombyx mori</i> ]                                                                                                                                                                                                                                                              |
| Arachidonic acid metabolism                            | 0.0079694   | serine protease inhibitor 21 isoform X3 [ <i>Bombyx mori</i> ], alaserpin-like [ <i>Bombyx mori</i> ] SCO-spondin [ <i>Bombyx mori</i> ], retrotransposon gag domain-containing protein 1-like [ <i>Ficedula albicollis</i> ]                                                                                                                                                                                                                                                                                                                      |
| Amoebiasis                                             | 0.014034042 |                                                                                                                                                                                                                                                                                                                                                                                                                                                                                                                                                    |
| Linoleic acid metabolism                               | 0.0178179   | phospholipase A2-like [ <i>Bombyx mori</i> ], 4phospholipase A2-like isoform X1 [ <i>Bombyx mori</i> ] 15-hydroxyprostaglandin dehydrogenase [NAD(+)]-like [ <i>Bombyx mori</i> ] ,alcohol dehydrogenase precursor [ <i>Bombyx mori</i> ] ,15-hydroxyprostaglandin dehydrogenase [NAD(+)]-like [ <i>Bombyx mori</i> ] ,15-hydroxyprostaglandin dehydrogenase [NAD(+)]-like [ <i>Bombyx mori</i> ] phospholipase A2-like [ <i>Bombyx mori</i> ] , rRNA 2'-O-methyltransferase fibrillar-like [ <i>Bombyx mori</i> ], 1-acyl-sn-glycerol-3-phosphate |
| Transcriptional misregulation in cancer                | 0.024704244 | acyltransferase alpha-like [ <i>Bombyx mori</i> ] ,phospholipase A2-like isoform X1 [ <i>Bombyx mori</i> ] cuticular protein RR-2 motif 60 precursor [ <i>Bombyx mori</i> ], cuticular protein RR-2 motif 58 precursor 03 [ <i>Bombyx mori</i> ], cuticular protein RR-2 motif 124 precursor [ <i>Bombyx mori</i> ]                                                                                                                                                                                                                                |
| Glycerophospholipid metabolism                         | 0.0263064   | lipase 1-like [ <i>Bombyx mori</i> ], lipase 1-like [ <i>Bombyx mori</i> ] cuticular protein RR-2 motif 60 precursor [ <i>Bombyx mori</i> ] ,cuticular protein RR-2 motif 58 precursor 26 [ <i>Bombyx mori</i> ] ,caspase-8-like [ <i>Bombyx mori</i> ] .cuticular protein RR-2 motif 124 precursor                                                                                                                                                                                                                                                |
| RNA polymerase                                         | 0.0285058   |                                                                                                                                                                                                                                                                                                                                                                                                                                                                                                                                                    |
| Steroid biosynthesis                                   | 0.0322554   |                                                                                                                                                                                                                                                                                                                                                                                                                                                                                                                                                    |
| Herpes simplex infection                               | 0.0342832   |                                                                                                                                                                                                                                                                                                                                                                                                                                                                                                                                                    |

---

---

|                                                                         |             |                                                                                                                                                               |
|-------------------------------------------------------------------------|-------------|---------------------------------------------------------------------------------------------------------------------------------------------------------------|
|                                                                         |             | <i>[Bombyx mori]</i>                                                                                                                                          |
| alpha-Linolenic acid metabolism                                         | 0.034595265 | <i>phospholipase A2-like [Bombyx mori] ,phospholipase A2-like isoform X1 [Bombyx mori]</i>                                                                    |
| Salivary secretion                                                      | 0.065217254 | <i>G-protein coupled receptor moody-like [Bombyx mori] ,Osteopontin ,sericin 1-like isoform X8 [Bombyx mori]</i>                                              |
| Amino sugar and nucleotide sugar metabolism                             | 0.080679888 | <i>nose resistant to fluoxetine protein 6-like [Bombyx mori] , N-acetylneuraminate lyase-like [Bombyx mori] ,N-acetylneuraminate lyase-like [Bombyx mori]</i> |
| Vascular smooth muscle contraction                                      | 0.086856672 | <i>phospholipase A2-like [Bombyx mori] , G-protein coupled receptor moody-like [Bombyx mori] ,phospholipase A2-like isoform X1 [Bombyx mori]</i>              |
| Glycosaminoglycan biosynthesis - chondroitin sulfate / dermatan sulfate | 0.113961615 | <i>beta-1,4-galactosyltransferase 7-like [Bombyx mori]</i>                                                                                                    |
| Betalain biosynthesis                                                   | 0.133264342 | <i>extradiol ring-cleavage dioxygenase-like [Bombyx mori]</i>                                                                                                 |
| Toxoplasmosis                                                           | 0.135497312 | <i>caspase-8-like [Bombyx mori] ,cuticular protein 12 glycine-rich 19 precursor [Bombyx mori]</i>                                                             |

---
